# Supplementary material
Source: PubMed Central journal article supplement (PMC3528101)

SIRT6

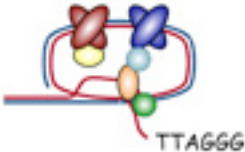

Supplement: NIHMS425442-supplement-1.pdf [file NIHMS425442-supplement-1.pdf]
